# Supplementary material for: Mass spectrometry imaging in plants, microbes, and food: a review
Source: Royal Society of Chemistry journal article supplement (doi:10.1039/d4an00644e), 2024-01-01
Supplement: d4an00644e1.pdf [file d4an00644e1.pdf]

# The Applications and Methodologies of Mass Spectrometry Imaging in Plants, Microbes, and Food: A Review

Mudita Vats<sup>a</sup>, Berta Cillero-Pastor<sup>a,b</sup>, Eva Cuypers<sup>a</sup> and Ron M.A. Heeren<sup>a\*</sup>

<sup>a</sup> Maastricht MultiModal Molecular Imaging Institute (M4i), Division of Imaging Mass Spectrometry, Maastricht University, Maastricht, the Netherlands

<sup>b</sup> MERLN Institute for Technology-inspired Regenerative Medicine, Department of Cell Biology-Inspired Tissue Engineering (cBITE), Maastricht University, Maastricht, the Netherlands

\* Corresponding author's contact details: Prof. Dr. Ron M.A. Heeren, The Maastricht MultiModal Molecular Imaging (M4i) institute, Division of Imaging Mass Spectrometry (IMS), Maastricht University, Maastricht, 6229 ER, Netherlands.

Telephone +31433881499, fax +31433884154, [r.heeren@maastrichtuniversity.nl](mailto:r.heeren@maastrichtuniversity.nl)

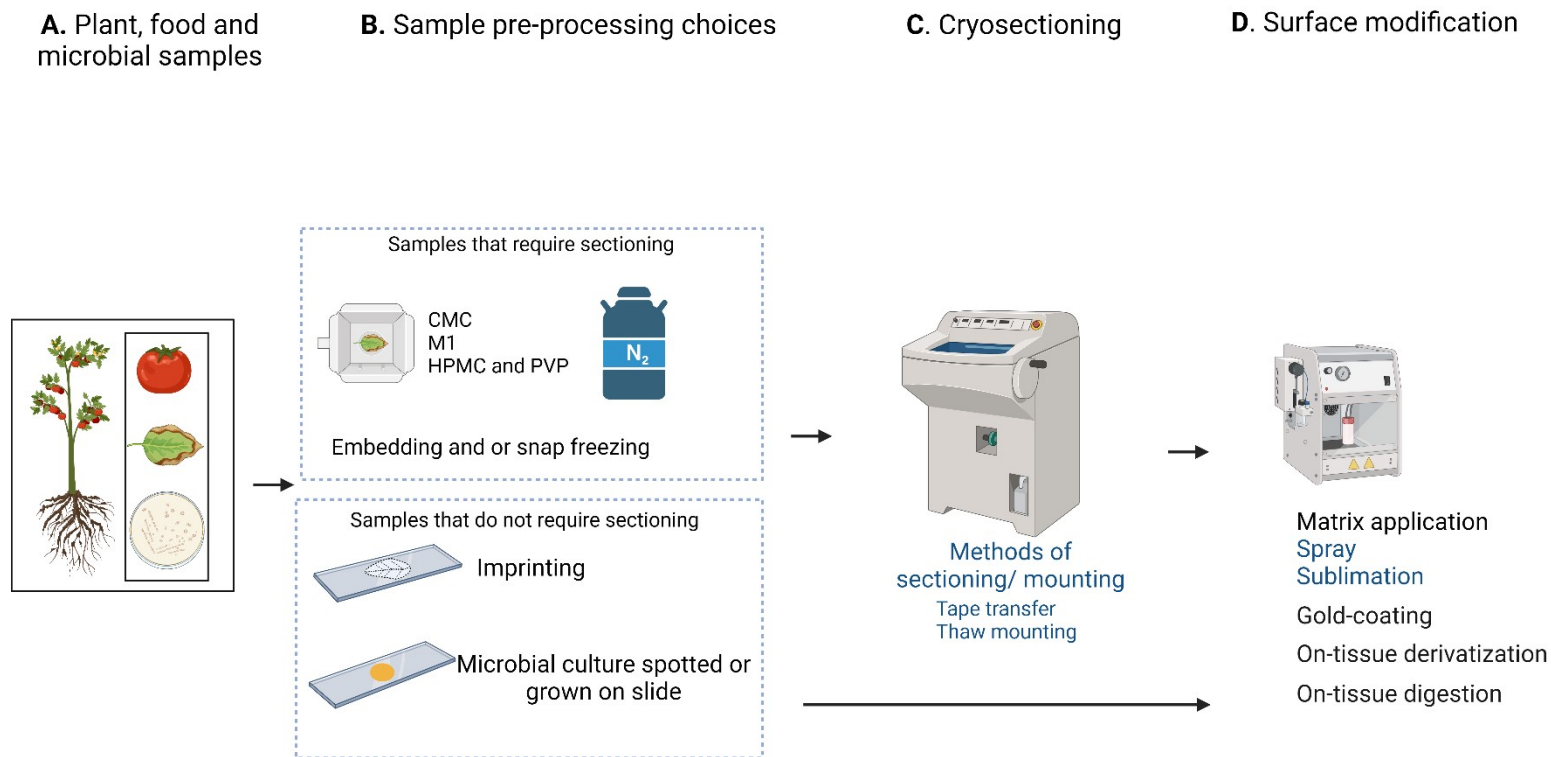

*Figure S1: Sample preparation methods of plant, food and microbial samples. (A) The samples, (B) sample pre-processing is divided into two parts; samples that require sectioning (**snap freezing** or **embedding followed by snap freezing**) and the samples that do not need to section (**imprinting** or **culturing**). Most common embedding mediums include Carboxymethyl cellulose (CMC), M1 embedding medium and mixture of hydroxypropyl methylcellulose (HPMC) and polyvinylpyrrolidone (PVP). (C) cryosectioning where the samples can be obtained by thaw mounting on the slides or with tape transfer method<sup>1-3</sup> and (D) the samples can then be further modified by application of matrix, gold-coating, on-tissue derivatization or on-tissue tryptic digestion depending on the requirement of the research. Figure Created with BioRender.com*

**Table 1** Literature review of sample types, analytical techniques used, project objectives, compound types, and spatial resolutions in the reviewed studies

| Sample                          | Technique                         | Project purpose                                                                                                               | Compound types                                                                                                         | Spatial resolution                                                              | Reference |
|---------------------------------|-----------------------------------|-------------------------------------------------------------------------------------------------------------------------------|------------------------------------------------------------------------------------------------------------------------|---------------------------------------------------------------------------------|-----------|
| Plant root-bacteria             | MALDI-MSI and ESI-Q-TOF           | Metabolite distribution in roots and root nodules of <i>M. truncatula</i> during nitrogen fixation.                           | Organic acids, amino acids, sugars, lipids and flavonoids                                                              | Spot diameter 50 $\mu\text{m}$                                                  | 4         |
| Strawberry                      | MALDI-MSI and MALDI-MS            | MALDI-MSI analysis for food-related metabolites in ripe strawberries                                                          | Anthocyanin, sugars and organic acids                                                                                  | Step size 200 $\mu\text{m}$                                                     | 5         |
| Blueberry                       | MALDI-FT-ICR-MSI, UHPLC-HRMS, ICS | Understand the spatial accumulation patterns of polyphenols and related primary metabolites during bilberry fruit development | Secondary metabolites (flavonoids and HCAs) and related primary metabolites (sugars and amino acids)                   | laser beam width $\sim$ 30 $\mu\text{m}$ , raster step size of 60 $\mu\text{m}$ | 6         |
| Soybean-aphid and rice-bacteria | MALDI and NALDI                   | Plant-pest interactions in soybean-aphid and rice-bacteria                                                                    | Pipecolic acid, salicylic acid, phytoalexins, momilactones, phytocassanes, nucleobases, phosphocholine and amino acids | 30 $\mu\text{m}$ and 10 $\mu\text{m}$                                           | 7         |
| Tomato                          | MALDI, LC-MS                      | Metabolites associated to ripening and physical stress                                                                        | Malate, aspartate, glutamine, caffeate and AMP                                                                         | 50 $\mu\text{m}$                                                                | 8         |

|                                                               |                                    |                                                                                                                          |                                                                                                                                             |                               |    |
|---------------------------------------------------------------|------------------------------------|--------------------------------------------------------------------------------------------------------------------------|---------------------------------------------------------------------------------------------------------------------------------------------|-------------------------------|----|
| Leaves of <i>G. sepium</i>                                    | MALDI-MSI, LDI-MS, LDI-MSI, ESI-MS | Plant's cosmetic potential                                                                                               | Polyphenol, fatty acids and flavonoids                                                                                                      | 30µm                          | 9  |
| Leaves of coca                                                | MALDI-FT-ICR-MSI, LDI-MS, ESI-MS   | Distribution of alkaloids                                                                                                | Cocaine                                                                                                                                     | 50 µm × 50 to 160 µm × 160 µm | 10 |
| <i>Streptomyces coelicolor</i>                                | ToF-SIMS                           | Distribution of two antibiotics in <i>Streptomyces coelicolor</i>                                                        | Blue antibiotic (major constituent actinorhodin)<br>Red antibiotic (major constituents- butylcycloheptylprodiginine and undecylprodigiosin) | not mentioned                 | 11 |
| Bacteria and fungal hyphae                                    | ToF-SIMS                           | Carbon (C) and nitrogen (N) assimilation by individual bacterium and fungal hyphae in soil                               |                                                                                                                                             | <200 nm                       | 12 |
| <i>Prunus laurocerasus</i>                                    | ToF-SIMS                           | Distribution of herbicides on the cuticle of leaves of <i>Prunus laurocerasus</i> and the diffusion into the sub-surface | Surfactants and sulfosates                                                                                                                  | 1 µm                          | 13 |
| <i>Bacillus amyloliquefaciens</i> S499 associated with tomato | ToF-SIMS and LC-ESI-MS             | Study the in-situ production of a class of antibiotics by <i>Bacillus amyloliquefaciens</i> S499 in the roots of tomato  | Cyclic lipopeptides                                                                                                                         | not mentioned                 | 14 |
| <i>Populus tremuloides</i>                                    | ToF-SIMS and SEM                   | Distributions of heavy metals in rhizospheric region of <i>populus tremuloides</i>                                       | Calcium (Ca), magnesium (Mg), sodium (Na), potassium (K), silicon (Si) and aluminium (Al)                                                   | 1.5 µm                        | 15 |

|                                                               |                                     |                                                                                                                            |                                                                                           |                                |    |
|---------------------------------------------------------------|-------------------------------------|----------------------------------------------------------------------------------------------------------------------------|-------------------------------------------------------------------------------------------|--------------------------------|----|
| Plant root-microorganisms                                     | Nano-SIMS and TEM                   | Visualize the distribution of $^{15}\text{N}/^{14}\text{N}$ in-situ in symbiotic relationship                              | $^{15}\text{N}/^{14}\text{N}$                                                             | 100 nm                         | 16 |
| Anabaena and rhizobium                                        | Nano-SIMS and EL-FISH               | Mutualistic interaction of filamentous <i>Anabaena</i> and Rhizobium                                                       | Isotopically labelled carbon and nitrogen                                                 | ~ 150 nm                       | 17 |
| Ivy and jade plant                                            | SF-PESI-MS and LESA-MS              | Pesticides on plant parts                                                                                                  | Pesticide formulation (acephate)                                                          | na                             | 18 |
| <i>Schizophyllum commune</i> and <i>Hypholoma fasciculare</i> | LESA-HRMS and Raman microscopy      | Study the metabolic interactions between two wood-rot fungi, <i>Schizophyllum commune</i> and <i>Hypholoma fasciculare</i> | Secondary metabolites such as indigo, indirubin and isatin                                |                                | 19 |
| Rice node                                                     | LA-ICP-MSI                          | Localization of macro and micro-elements in rice                                                                           | Mg, Ca, K, Cu, Mn and Fe                                                                  | 8 to 25 $\mu\text{m}$          | 20 |
| Sunflower leaves                                              | LA-ICP-MSI                          | Localization of macro and micro-elements in sunflower leaves                                                               | Ca, Cr, P, Fe, S, Cd, Ce, Cu, La, Mn, K, Ni and Zn                                        | 180 $\mu\text{m}$              | 21 |
| <i>Coptis chinensis Franch</i>                                | LA-ICP-MSI                          | Spatial micromapping of Cr and other elements in <i>Coptis chinensis Franch</i>                                            | Cr, Fe, Mn, Ca, and Zn                                                                    | spot diameter 44 $\mu\text{m}$ | 22 |
| <i>Arabidopsis thaliana</i> and <i>hypericum perforatum</i>   | LDI-MSI                             | Localize UV-absorbing secondary metabolites in single cells of <i>Arabidopsis thaliana</i> and <i>hypericum perforatum</i> | Hypercin, pseudohypercin, quercetin, rutin, kaempferol, isorhamnetin                      | ~10 $\mu\text{m}$              | 23 |
| <i>Vitis vinifera</i> leaves                                  | LDI-MSI and fluorescence microscopy | The spatial distributions of viniferins in UV-stressed and <i>plasmopara viticola</i> infected <i>vitis vinifera</i>       | Phytoalexins, stilbene, viniferins                                                        | 50 $\mu\text{m}$               | 24 |
| <i>Allium cepa</i> and <i>Fittonia argyroneura</i>            | LAESI-MSI                           | Metabolite content in individual <i>Allium cepa</i> cells and <i>Fittonia argyroneura</i> leaves                           | Malic acid, maleic acid, catechol, furoic acid, phthalide, and glycineamideribonucleotide |                                | 25 |
| <i>Allium cepa</i>                                            | LAESI-MSI                           | Distinguish between pigmented and non-pigmented cells of onion ( <i>Allium cepa</i> )                                      | Cyanidin                                                                                  | ~ 30 $\mu\text{m}$             | 26 |

|                                                  |               |                                                                                                           |                                                                                                                                       |                                                     |    |
|--------------------------------------------------|---------------|-----------------------------------------------------------------------------------------------------------|---------------------------------------------------------------------------------------------------------------------------------------|-----------------------------------------------------|----|
| Lemon, rose, rye, cherry tomato, and maize       | LAESI-MSI     | Pesticide residues on plant surfaces                                                                      | Imazalil, thiabendazole, lycoperside and esculeoside                                                                                  | 150 $\mu\text{m}$                                   | 27 |
| Grape vine                                       | DESI-MSI      | Distribution of metabolites in grapevine stem                                                             | Malic acid, tartaric acid, citric acid, glutaric acid and adipic acid                                                                 | 200 $\mu\text{m}$ step size                         | 28 |
| Grapes, wine and fabric                          | Nano-DESI-MSI | Detect the presence of anthocyanin in wine and grapes from different cultivars                            | Anthocyanin                                                                                                                           |                                                     | 29 |
| Potato                                           | DESI-MSI      | Metabolic changes during <i>Pythium ultimum</i> infection in potatoes                                     | Glycoalkaloids, solasodiene, solanidine, solasodenone, solasodine, solanaviol, and solaspiralide                                      | Lateral spatial resolution 150 to 200 $\mu\text{m}$ | 30 |
| Bacteria, fungi and oomycetes                    | DESI-MSI      | Interactions between endophytic bacteria and cacao pathogen                                               | Metabolites and phospholipids such as Pyrrolnitrin glycerophosphoethanolamines, glycerophosphatidic acid, and glycerophosphoglycerols | spatial resolution of 200 $\mu\text{m}$             | 31 |
| <i>S. miltiorrhiza</i> and <i>S. grandifolia</i> | DESI-MSI      | Molecular mechanisms of terpenoid biosynthesis in <i>S. miltiorrhiza</i> and <i>S. grandifolia</i>        | Tricyclic diterpenes like 11-hydroxy-sugiol, 11-hydroxy-ferruginol, 11,20-dihydroxy-sugiol, and 11,20-dihydroxy-ferruginol            |                                                     | 32 |
| Plant leaves                                     | DESI-MSI      | Investigation of pesticide distribution both on the surface of leaves and in cross sections of plant stem | Pyrethrins, rapeseed oil, imidacloprid and methiocarb                                                                                 | 50-100 $\mu\text{m}$                                | 33 |

|                                                                                                                                    |                                       |                                                                                        |                                                           |                                                                                                                                        |    |
|------------------------------------------------------------------------------------------------------------------------------------|---------------------------------------|----------------------------------------------------------------------------------------|-----------------------------------------------------------|----------------------------------------------------------------------------------------------------------------------------------------|----|
| Apple                                                                                                                              | 3D-imaging with REIMS                 | Distinguish between molecular distributions on the apple peel and inside               | Lipids                                                    | 2 mm                                                                                                                                   | 34 |
| Kiwi, orange, purple carrots, german sausage, gouda cheese and ginger bread                                                        | MALDI-MSI with AP-SMALDI10 ion source | Detect and image the ingredients, constituents, contaminants and additives in food     | Anthocyanin, beta-carotene, natamycin, fat and acrylamide | Kiwi- 45 $\mu\text{m}$ , carrot-50 $\mu\text{m}$ , sausage- 20 $\mu\text{m}$ , gingerbread-200 $\mu\text{m}$ , cheese-20 $\mu\text{m}$ | 35 |
| San Pedro cactus (Echinopsis pachanoi), jimsonweed (Datura stramonium) fruits and seeds, and tobacco (Nicotiana tabacum) seedlings | LDI                                   | Distribution of plant metabolites in native tissues                                    | Alkaloids, mescaline and nicotine                         | 100 $\mu\text{m}$                                                                                                                      | 36 |
| Strawberry                                                                                                                         | MALDI-TOF-MSI                         | Distribution of strawberry plant metabolites at different maturity stages              | Sugars, anthocyanin, phytochemicals                       | 200 $\mu\text{m}$                                                                                                                      | 37 |
| Kidney bean                                                                                                                        | MALDI-MSI                             | Derivatization of abscisic acid and 12-oxo-phytodienoic acid using GirT derivatization | Abscisic acid and 12-oxo-phytodienoic acid                | 100 $\mu\text{m}$                                                                                                                      | 38 |
| Cucumber                                                                                                                           | MALDI-FTICR-MSI                       | Distribution of procymidone in cucumber                                                | Procymidone                                               | 100 $\mu\text{m}$                                                                                                                      | 39 |
| Sorghum                                                                                                                            | MALDI-MSI and LC-MS                   | accumulation of dhurrin (cyanogenic glucoside) in germinating sorghum                  | Metabolites, dhurrin and its recycling products           | 30 $\mu\text{m}$                                                                                                                       | 40 |
| Wheat grain                                                                                                                        | MALDI-MSI                             | Spatial distribution of polysaccharides in wheat endosperm                             | oligosaccharides                                          | 100 $\mu\text{m}$                                                                                                                      | 41 |

|                                                    |                    |                                                                             |                                                                                                             |                                       |    |
|----------------------------------------------------|--------------------|-----------------------------------------------------------------------------|-------------------------------------------------------------------------------------------------------------|---------------------------------------|----|
| Maize                                              | AP-SMALDI-MSI      | Spatial distribution of aflatoxin B1 and plant defense metabolites in maize | Furanocoumarin, chlorins, flavonoid glycosides, steroid lactones, carbohydrates and glycosyldiacylglycerols | ≥5 μm laser spot size                 | 42 |
| Grape wine leaf                                    | MALDI-FTICR        | Spatial distribution of compounds during fungal infection                   | Stilbene phytoalexins                                                                                       | 50 μm                                 | 43 |
| Mung bean                                          | MALDI              | Lipids during germination                                                   | Glycerophospholipids, Glycerolipids, Sphingolipids and sterols                                              | 50 μm                                 | 44 |
| Rhizome of <i>Glycyrrhiza uralensis</i> (licorice) | DESI-MSI           | Distribution of small metabolites and oligosaccharides in the rhizome.      | Small metabolites, flavonoids, isoflavones, triterpenoids and hydrolyzed oligosaccharides                   | 200 μm                                | 45 |
| Cannabis leaves                                    | DESI and MALDI MSI | Distribution of cannabinoids and flavonoids on the trichomes of leaves      | Cannabinoids and flavonoids                                                                                 | DESI: 150-200 μm and MALDI-MSI: 20 μm | 1  |
| Tomato                                             | MALDI-MSI, LC-MS   | Function of Gorky compounds in tomato                                       | Esculeoside, tomatine and acetoxytomatine                                                                   | 50 μm                                 | 3  |
| Coffee                                             | AP-MALDI-MSI       | Spatial distribution of endogenous molecules                                | Caffeine, theophylline, theobromine, dicaffeoylquinic acid and caffeoylquinic acid                          | 75 μm                                 | 46 |
| Corn                                               | TOF-SIMS-MSI       | Sample preparation strategies                                               | Fatty acid and lipids                                                                                       | -                                     | 47 |
| Wheat leaf                                         | LAESI              | Study the penetration of agriculture formulations                           | Epoxiconazole and fluxapyroxad                                                                              | -                                     | 48 |



1. Lorensen, M. D. B. B.; Hayat, S. Y.; Wellner, N.; Bjarnholt, N.; Janfelt, C., Leaves of *Cannabis sativa* and their trichomes studied by DESI and MALDI mass spectrometry imaging for their contents of cannabinoids and flavonoids. *Phytochemical Analysis* **2023**, *34* (3), 269-279.
2. Balasubramanian, V. K.; Veličković, D.; Rubio Wilhelmi, M. D. M.; Anderton, C. R.; Stewart, C. N.; DiFazio, S.; Blumwald, E.; Ahkami, A. H., Spatiotemporal metabolic responses to water deficit stress in distinct leaf cell-types of poplar. *Frontiers in Plant Science* **2024**, *15*.
3. Kazachkova, Y.; Zemach, I.; Panda, S.; Bocobza, S.; Vainer, A.; Rogachev, I.; Dong, Y.; Ben-Dor, S.; Veres, D.; Kanstrup, C.; Lambertz, S. K.; Crocoll, C.; Hu, Y.; Shani, E.; Michaeli, S.; Nour-Eldin, H. H.; Zamir, D.; Aharoni, A., The GORKY glycoalkaloid transporter is indispensable for preventing tomato bitterness. *Nature Plants* **2021**, *7* (4), 468-480.
4. Ye, H.; Gemperline, E.; Venkateshwaran, M.; Chen, R.; Delaux, P. M.; Howes-Podoll, M.; Ané, J. M.; Li, L., MALDI mass spectrometry-assisted molecular imaging of metabolites during nitrogen fixation in the *M. edicago truncatula*-*S. inorhizobium meliloti* symbiosis. *The Plant Journal* **2013**, *75* (1), 130-145.
5. Enomoto, H.; Sato, K.; Miyamoto, K.; Ohtsuka, A.; Yamane, H., Distribution analysis of anthocyanins, sugars, and organic acids in strawberry fruits using matrix-assisted laser desorption/ionization-imaging mass spectrometry. *Journal of Agricultural and Food Chemistry* **2018**, *66* (19), 4958-4965.
6. Dare, A. P.; Günther, C. S.; Grey, A. C.; Guo, G.; Demarais, N. J.; Cordiner, S.; McGhie, T. K.; Boldingh, H.; Hunt, M.; Deng, C., Resolving the developmental distribution patterns of polyphenols and related primary metabolites in bilberry (*Vaccinium myrtillus*) fruit. *Food Chemistry* **2022**, *374*, 131703.
7. Klein, A. T.; Yagnik, G. B.; Hohenstein, J. D.; Ji, Z.; Zi, J.; Reichert, M. D.; MacIntosh, G. C.; Yang, B.; Peters, R. J.; Vela, J.; Lee, Y. J., Investigation of the Chemical Interface in the Soybean-Aphid and Rice-Bacteria Interactions Using MALDI-Mass Spectrometry Imaging. *Analytical Chemistry* **2015**, *87* (10), 5294-5301.
8. Nakamura, J.; Morikawa-Ichinose, T.; Fujimura, Y.; Hayakawa, E.; Takahashi, K.; Ishii, T.; Miura, D.; Wariishi, H., Spatially resolved metabolic distribution for unraveling the physiological change and responses in tomato fruit using matrix-assisted laser desorption/ionization-mass spectrometry imaging (MALDI-MSI). *Analytical and Bioanalytical Chemistry* **2017**, *409* (6), 1697-1706.
9. Hertel Pereira, A. C.; Auer, A. C.; Biedel, L.; de Almeida, C. M.; Romão, W.; Endringer, D. C., Analysis of *Gliricidia sepium* Leaves by MALDI Mass Spectrometry Imaging. *Journal of the American Society for Mass Spectrometry* **2022**, *33* (3), 573-583.
10. dos Santos, N. A.; de Almeida, C. M.; Gonçalves, F. F.; Ortiz, R. S.; Kuster, R. M.; Saquetto, D.; Romão, W., Analysis of *Erythroxylum coca* Leaves by Imaging Mass Spectrometry (MALDI-FT-ICR IMS). *Journal of the American Society for Mass Spectrometry* **2021**, *32* (4), 946-955.
11. Vaidyanathan, S.; Fletcher, J. S.; Goodacre, R.; Lockyer, N. P.; Micklefield, J.; Vickerman, J. C., Subsurface biomolecular imaging of *Streptomyces coelicolor* using secondary ion mass spectrometry. *Analytical chemistry* **2008**, *80* (6), 1942-1951.
12. Cliff, J. B.; Gaspar, D. J.; Bottomley, P. J.; Myrold, D. D., Exploration of inorganic C and N assimilation by soil microbes with time-of-flight secondary ion mass spectrometry. *Applied and Environmental Microbiology* **2002**, *68* (8), 4067-4073.

13. Perkins, M. C.; Bell, G.; Briggs, D.; Davies, M. C.; Friedman, A.; Hart, C. A.; Roberts, C. J.; Rutten, F. J. M., The application of ToF-SIMS to the analysis of herbicide formulation penetration into and through leaf cuticles. *Colloids and Surfaces B: Biointerfaces* **2008**, 67 (1), 1-13.
14. Nihorimbere, V.; Cawoy, H.; Seyer, A.; Brunelle, A.; Thonart, P.; Ongena, M., Impact of rhizosphere factors on cyclic lipopeptide signature from the plant beneficial strain *Bacillus amyloliquefaciens* S499. *FEMS Microbiology Ecology* **2012**, 79 (1), 176-191.
15. Martin, R. R.; Naftel, S.; Macfie, S.; Skinner, W.; Courchesne, F.; Séguin, V., Time of flight secondary ion mass spectrometry studies of the distribution of metals between the soil, rhizosphere and roots of *Populus tremuloides* Minchx growing in forest soil. *Chemosphere* **2004**, 54 (8), 1121-1125.
16. Clode, P. L.; Kilburn, M. R.; Jones, D. L.; Stockdale, E. A.; Cliff III, J. B.; Herrmann, A. M.; Murphy, D. V., In situ mapping of nutrient uptake in the rhizosphere using nanoscale secondary ion mass spectrometry. *Plant physiology* **2009**, 151 (4), 1751-1757.
17. Behrens, S.; Lösekann, T.; Pett-Ridge, J.; Weber, P. K.; Ng, W.-O.; Stevenson, B. S.; Hutcheon, I. D.; Relman, D. A.; Spormann, A. M., Linking microbial phylogeny to metabolic activity at the single-cell level by using enhanced element labeling-catalyzed reporter deposition fluorescence in situ hybridization (EL-FISH) and NanoSIMS. *Applied and environmental microbiology* **2008**, 74 (10), 3143-3150.
18. Mandal, M. K.; Ozawa, T.; Saha, S.; Rahman, M. M.; Iwasa, M.; Shida, Y.; Nonami, H.; Hiraoka, K., Development of sheath-flow probe electrospray ionization mass spectrometry and its application to real time pesticide analysis. *Journal of agricultural and food chemistry* **2013**, 61 (33), 7889-7895.
19. Menezes, R. C.; Kai, M.; Krause, K.; Matthäus, C.; Svatoš, A.; Popp, J.; Kothe, E., Monitoring metabolites from *Schizophyllum commune* interacting with *Hypholoma fasciculare* combining LESA-HR mass spectrometry and Raman microscopy. *Analytical and Bioanalytical Chemistry* **2015**, 407 (8), 2273-2282.
20. Yamaji, N.; Ma, J. F., Bioimaging of multiple elements by high-resolution LA-ICP-MS reveals altered distribution of mineral elements in the nodes of rice mutants. *The Plant Journal* **2019**, 99 (6), 1254-1263.
21. Kötschau, A.; Büchel, G.; Einax, J.; Fischer, C.; Von Tümping, W.; Merten, D., Mapping of macro and micro elements in the leaves of sunflower (*Helianthus annuus*) by Laser Ablation-ICP-MS. *Microchemical Journal* **2013**, 110, 783-789.
22. Huang, W.; Jiao, J.; Ru, M.; Bai, Z.; Yuan, H.; Bao, Z.; Liang, Z., Localization and Speciation of Chromium in *Coptis chinensis* Franch. using Synchrotron Radiation X-ray Technology and Laser Ablation ICP-MS. *Scientific Reports* **2018**, 8 (1), 8603.
23. Hölscher, D.; Shroff, R.; Knop, K.; Gottschaldt, M.; Crecelius, A.; Schneider, B.; Heckel, D. G.; Schubert, U. S.; Svatoš, A., Matrix-free UV-laser desorption/ionization (LDI) mass spectrometric imaging at the single-cell level: Distribution of secondary metabolites of *Arabidopsis thaliana* and *Hypericum* species. *The Plant Journal* **2009**, 60 (5), 907-918.
24. Becker, L.; Bellow, S.; Carré, V.; Latouche, G.; Poutaraud, A.; Merdinoglu, D.; Brown, S. C.; Cerovic, Z. G.; Chaimbault, P., Correlative analysis of fluorescent phytoalexins by mass spectrometry imaging and fluorescence microscopy in grapevine leaves. *Analytical chemistry* **2017**, 89 (13), 7099-7106.
25. Taylor, M. J.; Liyu, A.; Vertes, A.; Anderton, C. R., Ambient Single-Cell Analysis and Native Tissue Imaging Using Laser-Ablation Electrospray Ionization Mass Spectrometry with Increased Spatial Resolution. *Journal of the American Society for Mass Spectrometry* **2021**, 32 (9), 2490-2494.
26. Shrestha, B.; Patt, J. M.; Vertes, A., In situ cell-by-cell imaging and analysis of small cell populations by mass spectrometry. *Analytical chemistry* **2011**, 83 (8), 2947-2955.

27. Nielen, M. W.; van Beek, T. A., Macroscopic and microscopic spatially-resolved analysis of food contaminants and constituents using laser-ablation electrospray ionization mass spectrometry imaging. *Analytical and bioanalytical chemistry* **2014**, *406* (27), 6805-6815.
28. Dong, Y.; Guella, G.; Franceschi, P., Impact of tissue surface properties on the desorption electrospray ionization imaging of organic acids in grapevine stem. *Rapid Communications in Mass Spectrometry* **2016**, *30* (6), 711-718.
29. Hartmanova, L.; Ranc, V.; Papouskova, B.; Bednar, P.; Havlicek, V.; Lemr, K., Fast profiling of anthocyanins in wine by desorption nano-electrospray ionization mass spectrometry. *Journal of chromatography A* **2010**, *1217* (25), 4223-4228.
30. Tata, A.; Perez, C. J.; Hamid, T. S.; Bayfield, M. A.; Ifa, D. R., Analysis of metabolic changes in plant pathosystems by imprint imaging DESI-MS. *Journal of The American Society for Mass Spectrometry* **2014**, *26* (4), 641-648.
31. Araújo, F.; Vieira, R.; Molano, E.; Máximo, H.; Dalio, R.; Vendramini, P.; Araújo, W.; Eberlin, M., Desorption electrospray ionization mass spectrometry imaging reveals chemical defense of *Burkholderia seminalis* against cacao pathogens. *RSC advances* **2017**, *7* (48), 29953-29958.
32. Xia, J.; Lou, G.; Zhang, L.; Huang, Y.; Yang, J.; Guo, J.; Qi, Z.; Li, Z.; Zhang, G.; Xu, S.; Song, X.; Zhang, X.; Wei, Y.; Liang, Z.; Yang, D., Unveiling the spatial distribution and molecular mechanisms of terpenoid biosynthesis in *Salvia miltiorrhiza* and *S. grandifolia* using multi-omics and DESI-MSI. *Horticulture Research* **2023**, *10* (7).
33. Gerbig, S.; Stern, G.; Brunn, H. E.; Düring, R.-A.; Spengler, B.; Schulz, S., Method development towards qualitative and semi-quantitative analysis of multiple pesticides from food surfaces and extracts by desorption electrospray ionization mass spectrometry as a preselective tool for food control. *Analytical and Bioanalytical Chemistry* **2017**, *409* (8), 2107-2117.
34. Nauta, S. P.; Huysmans, P.; Tuijthof, G. J.; Eijkel, G. B.; Poeze, M.; Siegel, T. P.; Heeren, R. M., Automated 3D Sampling and Imaging of Uneven Sample Surfaces with LA-REIMS. *Journal of the American Society for Mass Spectrometry* **2021**, *33* (1), 111-122.
35. Kokesch-Himmelreich, J.; Wittek, O.; Race, A. M.; Rakete, S.; Schlicht, C.; Busch, U.; Römpf, A., MALDI mass spectrometry imaging: From constituents in fresh food to ingredients, contaminants and additives in processed food. *Food Chem* **2022**, *385*, 132529.
36. Moreno-Pedraza, A.; Rosas-Román, I.; Garcia-Rojas, N. S.; Guillén-Alonso, H.; Ovando-Vázquez, C.; Díaz-Ramírez, D.; Cuevas-Contreras, J.; Vergara, F.; Marsch-Martínez, N.; Molina-Torres, J.; Winkler, R., Elucidating the Distribution of Plant Metabolites from Native Tissues with Laser Desorption Low-Temperature Plasma Mass Spectrometry Imaging. *Analytical Chemistry* **2019**, *91* (4), 2734-2743.
37. Wang, J.; Yang, E.; Chaurand, P.; Raghavan, V., Visualizing the distribution of strawberry plant metabolites at different maturity stages by MALDI-TOF imaging mass spectrometry. *Food Chem* **2021**, *345*, 128838.
38. Enomoto, H.; Sensu, T.; Yumoto, E.; Yokota, T.; Yamane, H., Derivatization for detection of abscisic acid and 12-oxo-phytodienoic acid using matrix-assisted laser desorption/ionization imaging mass spectrometry. *Rapid Communications in Mass Spectrometry* **2018**, *32* (17), 1565-1572.
39. Taira, S.; Tokai, M.; Kaneko, D.; Katano, H.; Kawamura-Konishi, Y., Mass Spectrometry Imaging Analysis of Location of Procymidone in Cucumber Samples. *Journal of Agricultural and Food Chemistry* **2015**, *63* (27), 6109-6112.
40. Montini, L.; Crocoll, C.; Gleadow, R. M.; Motawia, M. S.; Janfelt, C.; Bjarnholt, N., Matrix-Assisted Laser Desorption/Ionization-Mass Spectrometry Imaging of Metabolites during Sorghum Germination1 [OPEN]. *Plant Physiology* **2020**, *183* (3), 925-942.

41. Veličković, D.; Ropartz, D.; Guillon, F.; Saulnier, L.; Rogniaux, H., New insights into the structural and spatial variability of cell-wall polysaccharides during wheat grain development, as revealed through MALDI mass spectrometry imaging. *Journal of Experimental Botany* **2014**, *65* (8), 2079-2091.
42. Righetti, L.; Bhandari, D. R.; Rolli, E.; Tortorella, S.; Bruni, R.; Dall'Asta, C.; Spengler, B., Unveiling the spatial distribution of aflatoxin B1 and plant defense metabolites in maize using AP-SMALDI mass spectrometry imaging. *The Plant Journal* **2021**, *106* (1), 185-199.
43. Maia, M.; Aziz, A.; Jeandet, P.; Carré, V., Profiling and Localization of Stilbene Phytoalexins Revealed by MALDI-MSI during the Grapevine–*Botrytis cinerea* Interaction. *Journal of Agricultural and Food Chemistry* **2023**, *71* (42), 15569-15581.
44. Xie, P.; Chen, J.; Wu, P.; Cai, Z., Spatial Lipidomics Reveals Lipid Changes in the Cotyledon and Plumule of Mung Bean Seeds during Germination. *Journal of Agricultural and Food Chemistry* **2023**, *71* (49), 19879-19887.
45. Zhao, Y.; Jiang, M.; Liu, M.; Wang, H.; Wang, W.; Zhang, T.; Tian, X.; Hong, L.; Yang, F.; Wang, Y.; Zou, Y.; Yu, H.; Li, Z.; Yang, W., Spatial Distribution and Characterization of the Small-Molecule Metabolites and In Situ Hydrolyzed Oligosaccharides in the Rhizome of *Glycyrrhiza uralensis* by Desorption Electrospray Ionization-Mass Spectrometry Imaging and High-Resolution Liquid Chromatography–Mass Spectrometry. *Journal of Agricultural and Food Chemistry* **2023**, *71* (50), 20372-20385.
46. Li, N.; Dong, J.; Dong, C.; Han, Y.; Liu, H.; Du, F.; Nie, H., Spatial Distribution of Endogenous Molecules in Coffee Beans by Atmospheric Pressure Matrix-Assisted Laser Desorption/Ionization Mass Spectrometry Imaging. *Journal of the American Society for Mass Spectrometry* **2020**, *31* (12), 2503-2510.
47. Kim, S. H.; Kim, J.; Lee, Y. J.; Lee, T. G.; Yoon, S., Sample Preparation of Corn Seed Tissue to Prevent Analyte Relocations for Mass Spectrometry Imaging. *Journal of The American Society for Mass Spectrometry* **2017**, *28* (8), 1729-1732.
48. Annangudi, S. P.; Gemperline, E.; Gilbert, J. R., Spatial and Depth Profiling of Agricultural Formulations in Leaf Tissue Using LAESI Mass Spectrometry. *Journal of the American Society for Mass Spectrometry* **2024**, *35* (5), 1007-1011.
